# Supplementary material for: Supracrustal origin of Earth’s earliest continents
Source: Research Square preprint supplement (doi:10.21203/rs.3.rs-8052631/v1), 2025-11-25
Supplement: Supplementary file 1 [file 92280b59cf6432c64b6d5765.docx]

Silicon isotope fractionation modeling

We modeled the silicon isotope fractionation during the formation of Luxi granitoids using the P-T condition, residual mineral assemblages, and melt chemistry calculated by Sun et al., 2021. The modeling procedure is similar to that described in Deng et al. (2019). We start with the mass balance equation between the concentration of SiO2 between source, melt and residue. Under the assumption of closed system behavior for the melting process, the relationship between the concentrations of SiO2 in each phase can be written as

Where F is the degree of melting and CSiO2 represents the concentration of SiO2. CSiO2source is derived from the measured average composition of 2.7Ga low-K tholeiitic rocks from the Eastern block, North China Craton, and CSiO2melt is derived from the calculated melt SiO2. Because the CSiO2source and CSiO2melt are calculated with respect to different compositions (weight percent of water is calculated in melt composition, which is not measurable in actual rock samples. Similarly, LOI in whole rock data is not calculated in theoretical melt composition), both CSiO2source and CSiO2melt are renormalized so their abundances are reported with respect to the same composition. CSiO2residue can be calculated from the renormalized CSiO2source andCSiO2melt. Silicon isotopes between melt, residue, and source can then be related to each other by the equation

Where the δ30Siresidue can be written as the fractionation between δ30Simelt and the fractionation between melt and residue.

For simplicity, we take the fractionation factors between silica melts and clinopyroxene, amphibole, garnet as 0.3‰, plagioclase as 0.03‰, quartz as -0.06‰ following Deng et al. (2019). Fractionation factor between melt and mica is taken as -0.14‰ based on the first principles calculation values in 2. All other minerals in the residue should have negligible effect on silicon isotopes due to their trace abundance or lack of silicon as a major element in their crystal structure. The fractionation factor between the melt and residual phase can then be calculated as the sum of silicon isotope fractionation factors between each mineral phases.

Where represents the fraction of SiO2 in each mineral phases relative to the residue. The δ30Simelt can thus be calculated by substituting δ30Siresidue via the third equation, and Δ30Simelt-residue via the fourth equation

The calculated δ30Simelt is plot again Sr/Sr*, where Sr* represents .


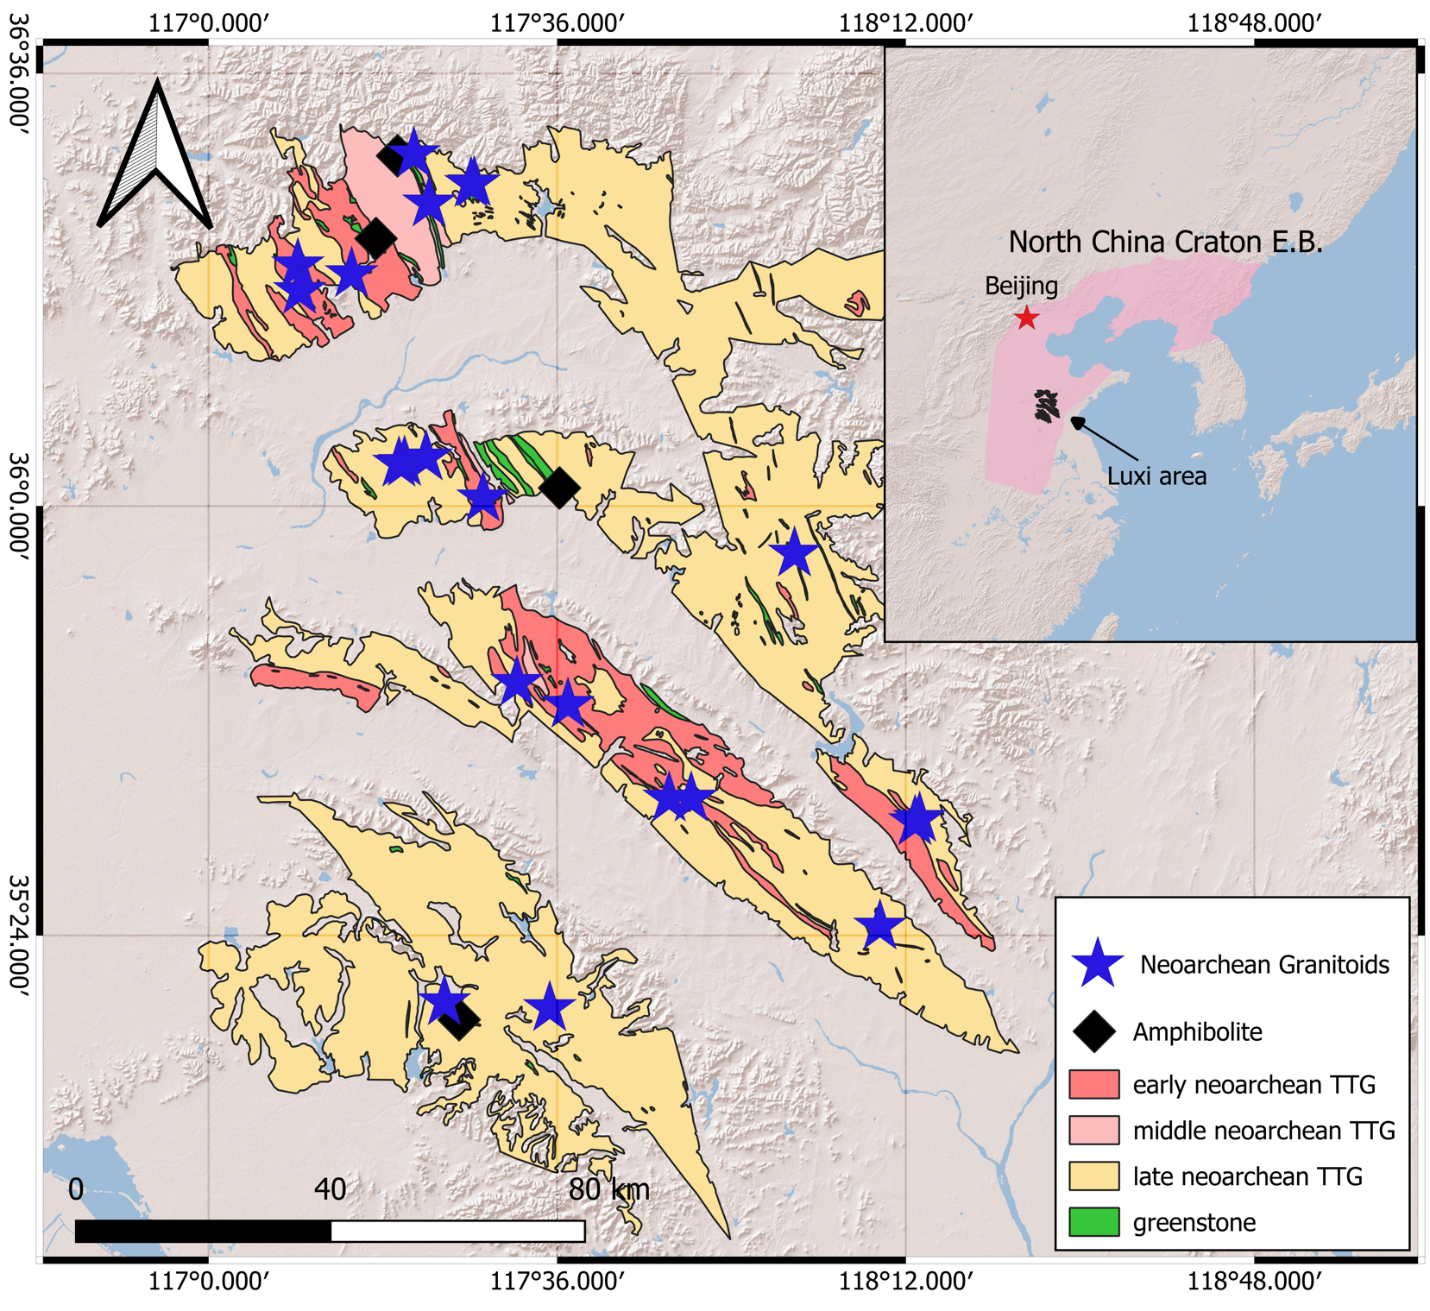


Figure S1: Geologic map of Luxi area, North China Craton and sampling locations.


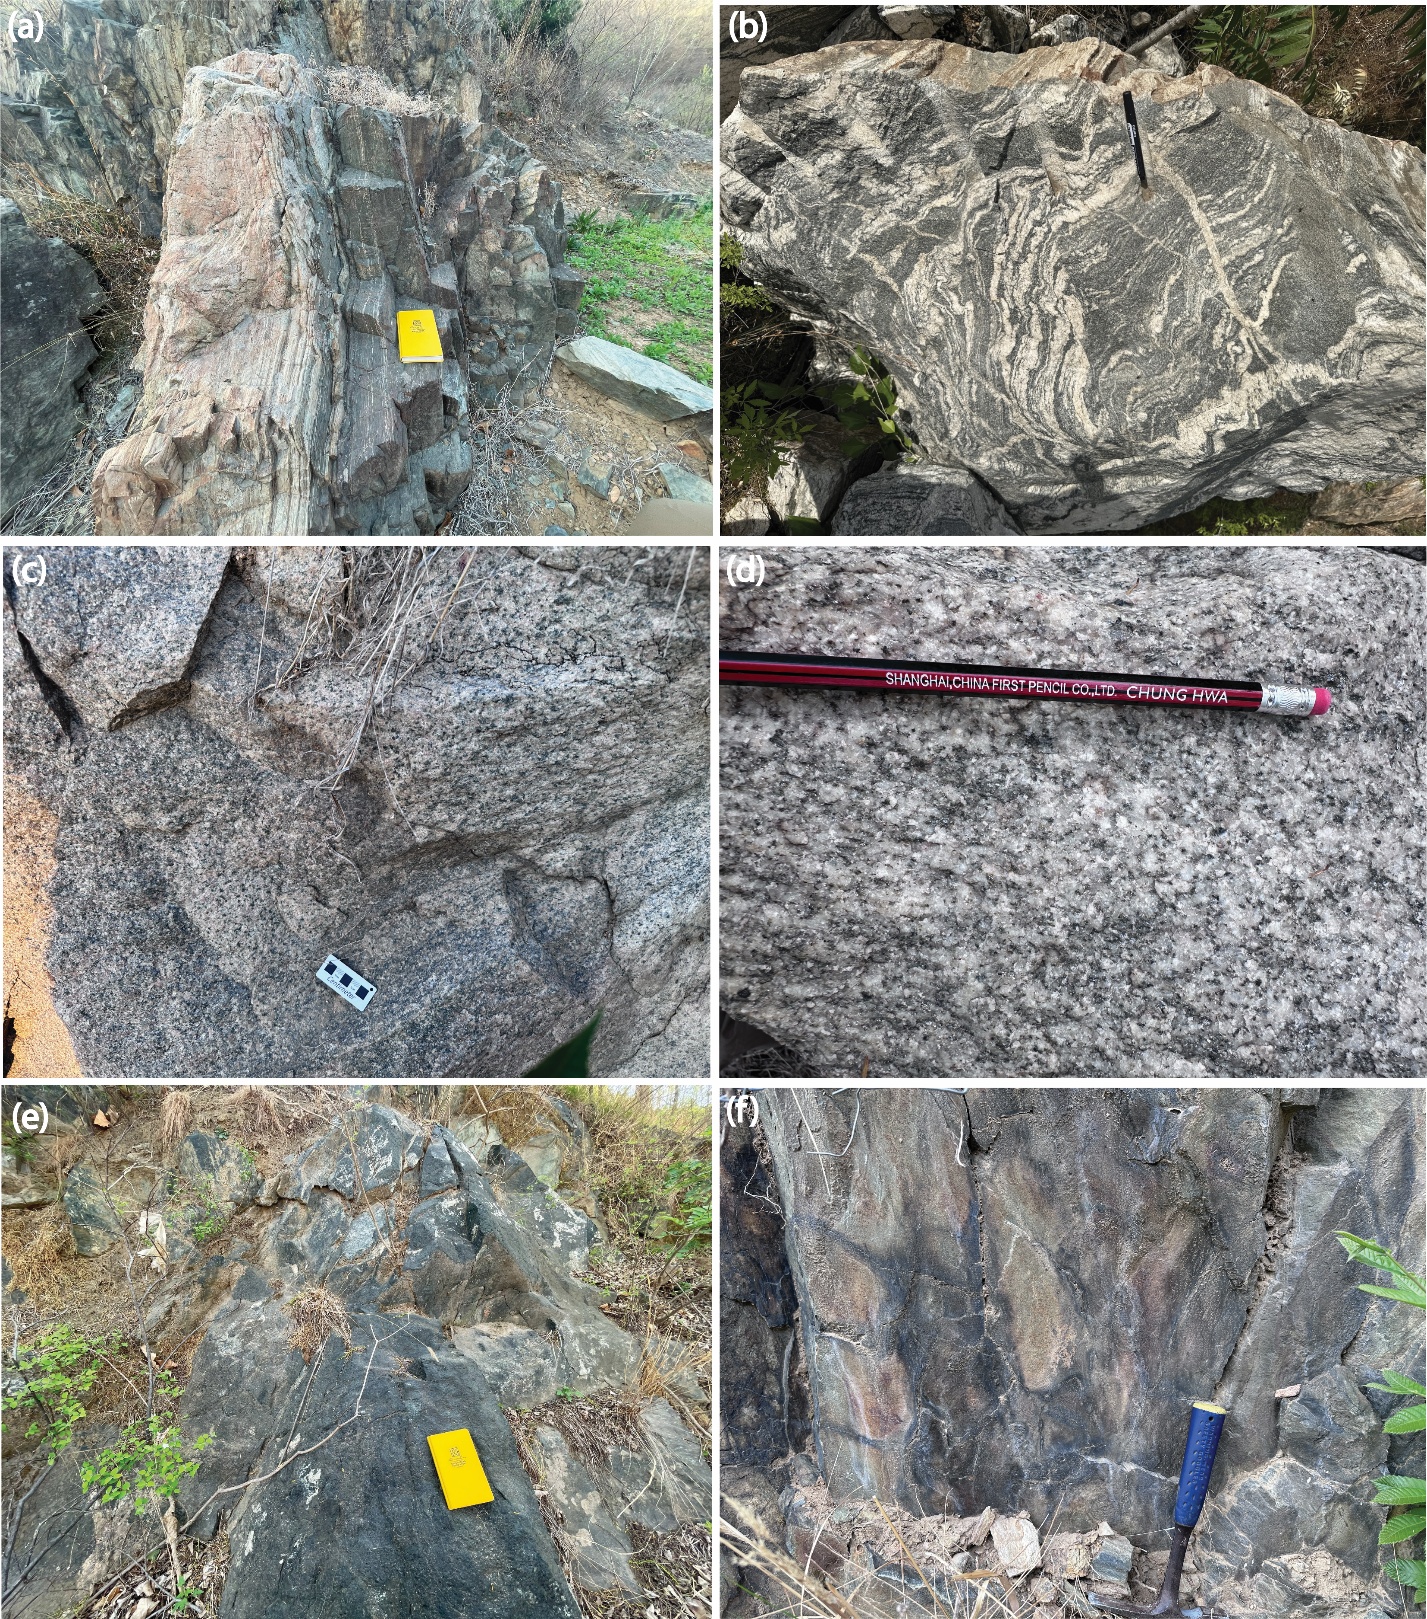
Figure S2: field photo of outcrops in Luxi area. (a) mylonitized 2.7Ga granitoids (b) 2.7Ga granitoids showing strong anatexis (c,d) massive 2.5Ga granitoids (e) amphibolite (f) pillowed basalts


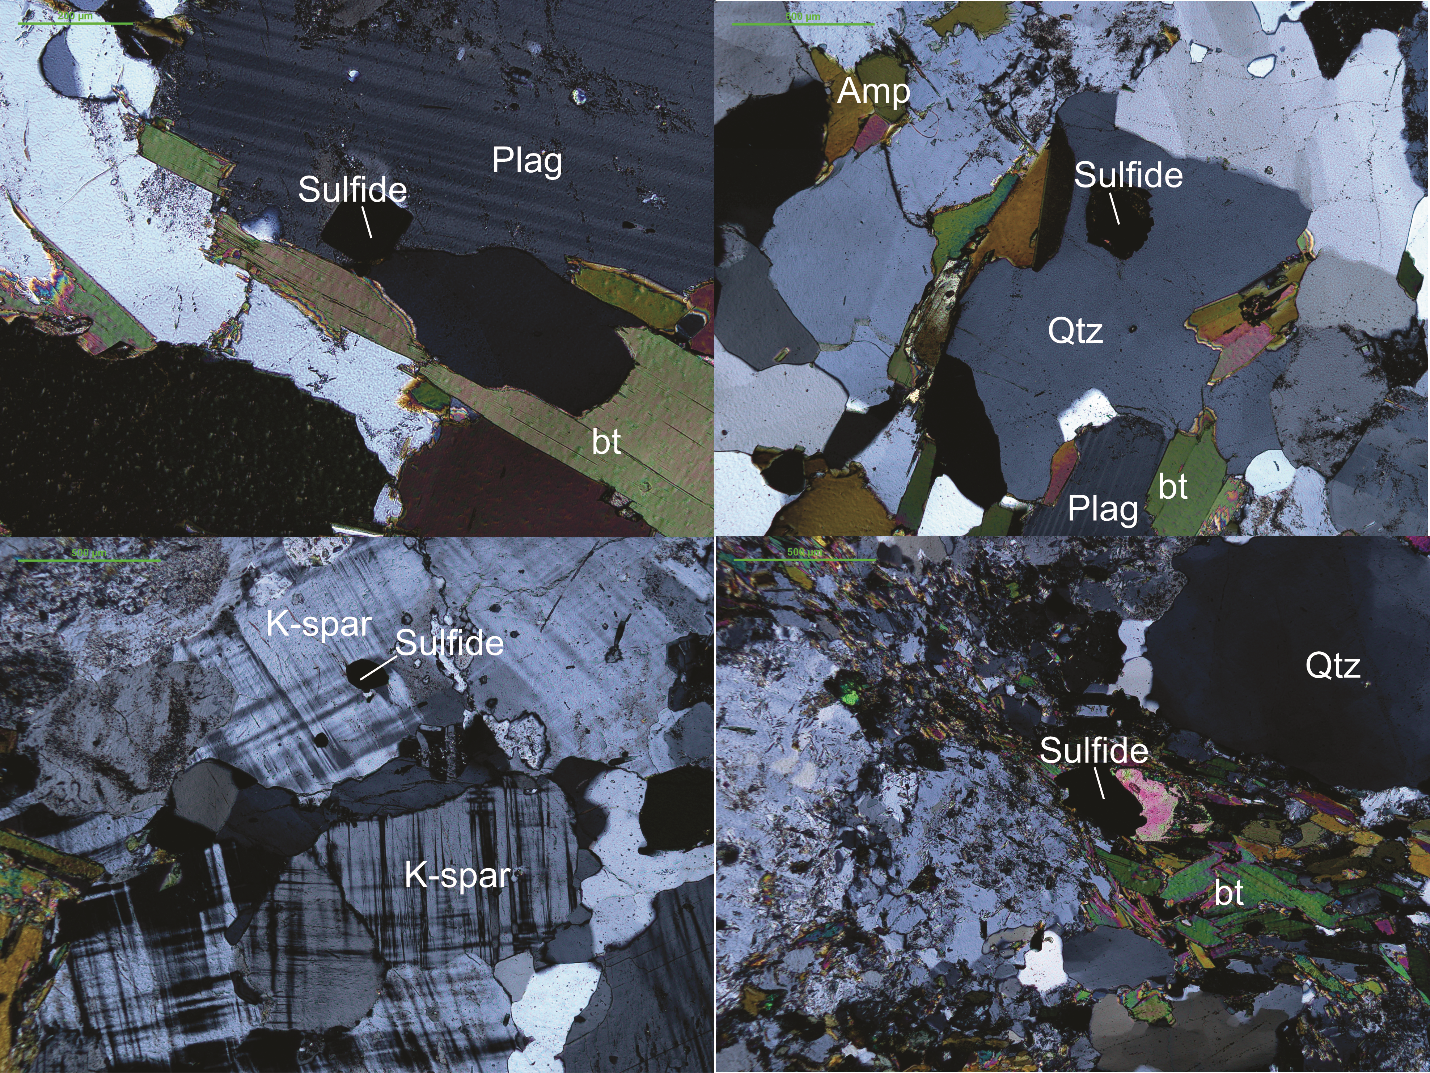


Figure S3: thin section images of sulfides in Luxi granitoids. Sulfides are found in various rock types and are included in different minerals.


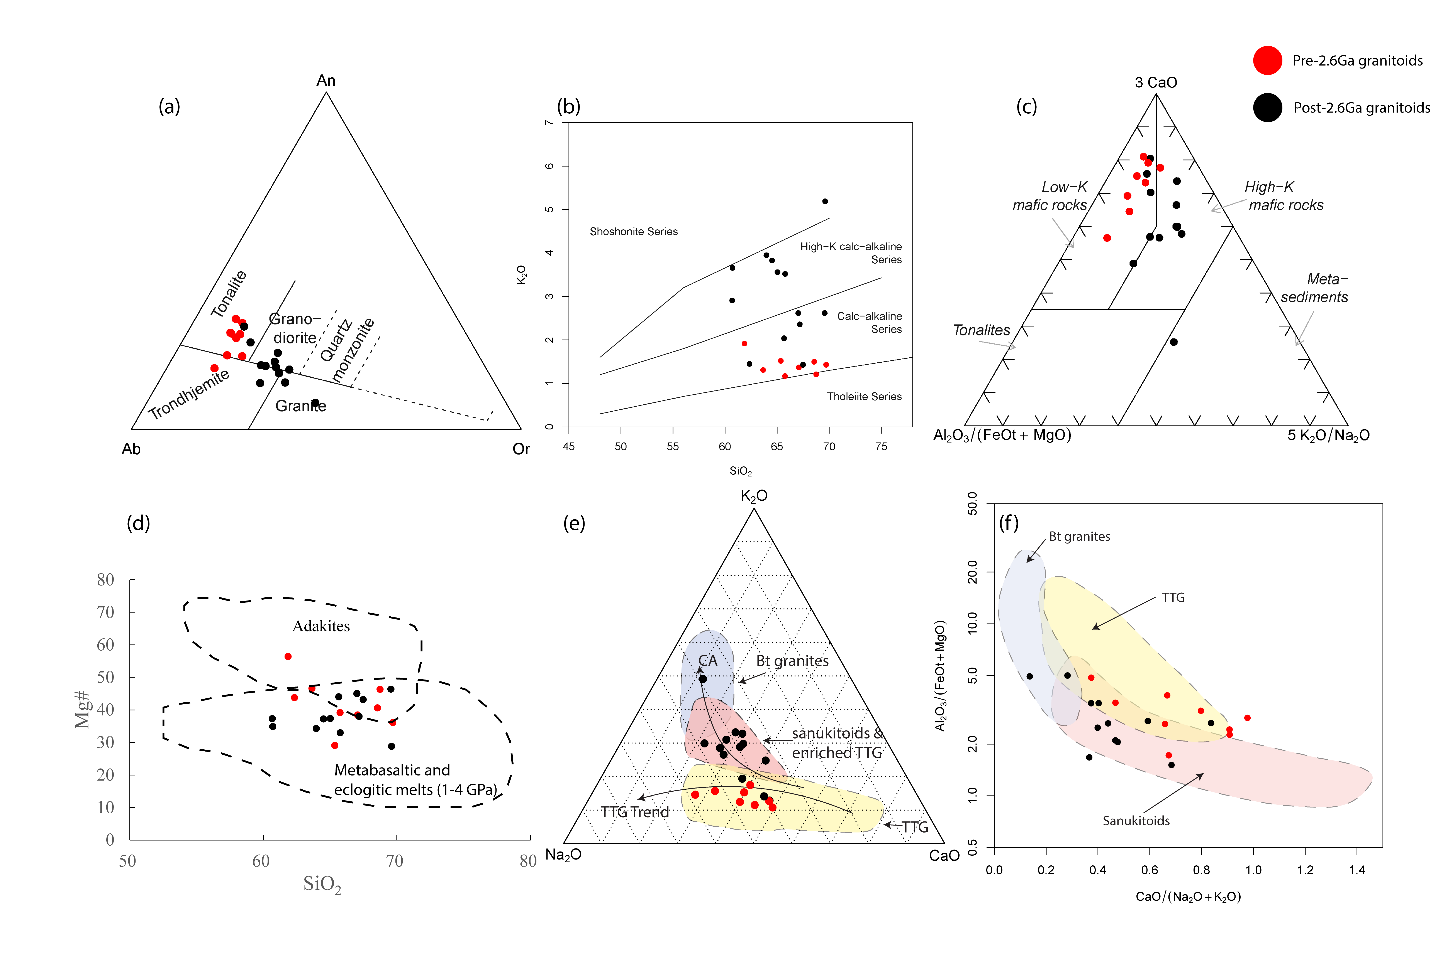


Figure S4: Classification diagrams of granitoids from Luxi area. Red color points represent pre-2.6Ga granitoids, and black color points are post-2.6Ga granitoids. Compared with pre-2.6Ga granitoids, the post 2.6Ga granitoids are enriched in K2O.


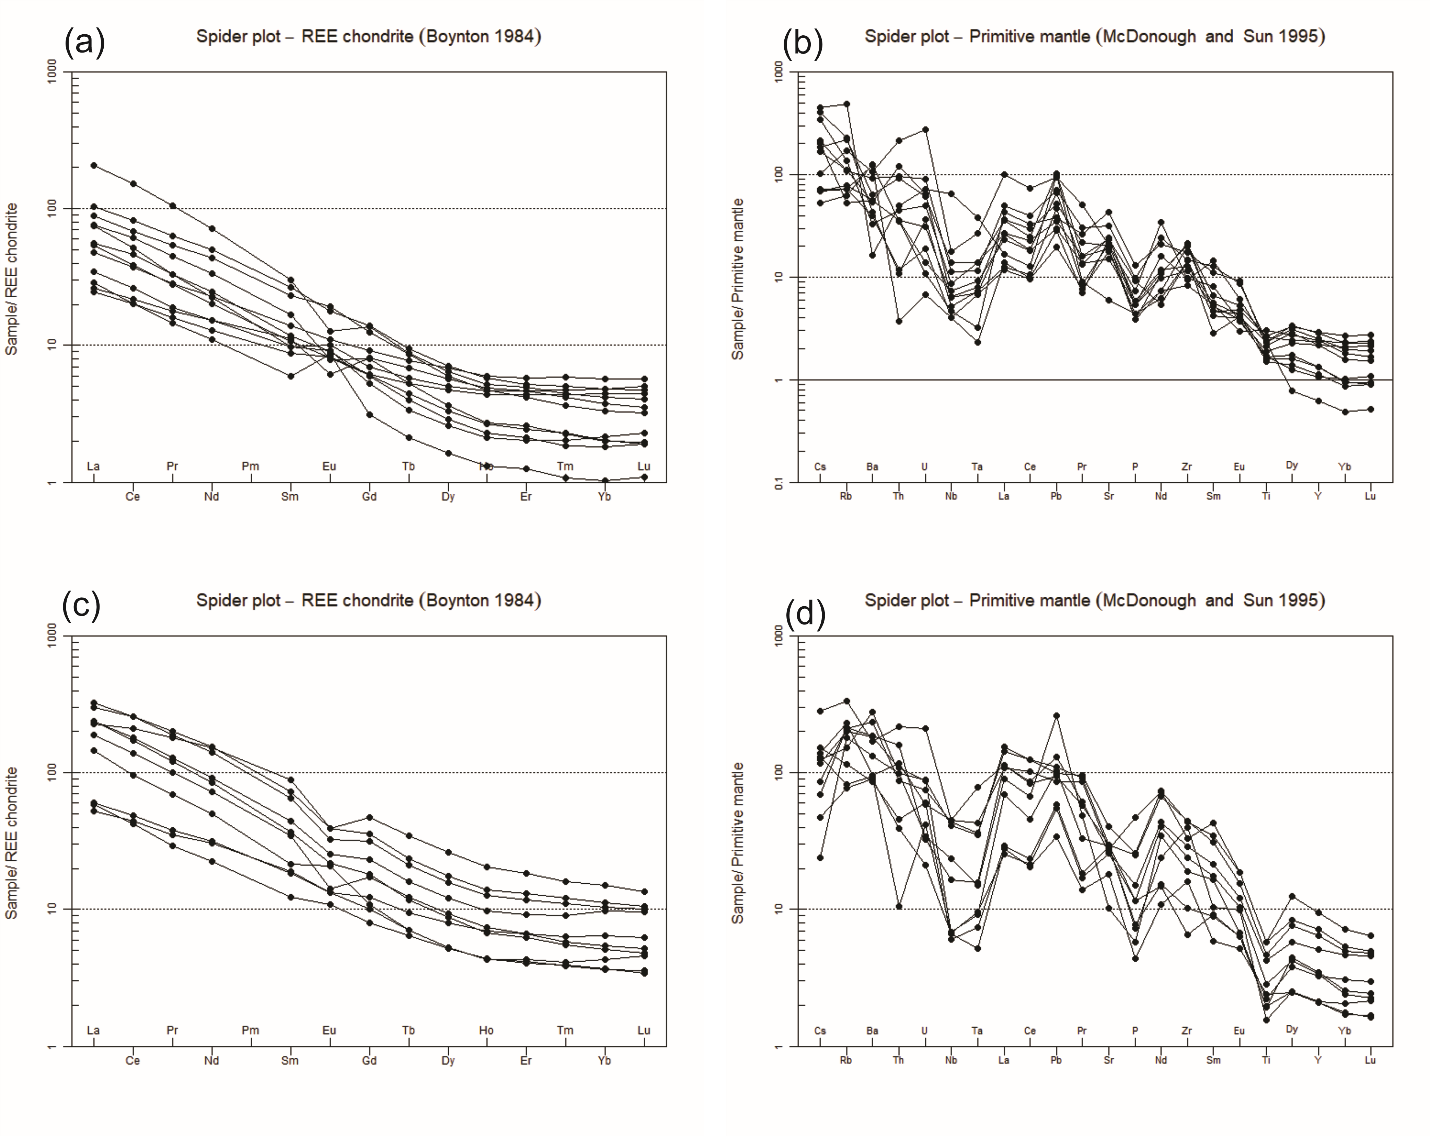


Figure S5: (a, b): Trace and REE elements spider plots of pre-2.6Ga granitoids. (c,d): Trace and REE elements spider plots of pose-2.6Ga granitoids


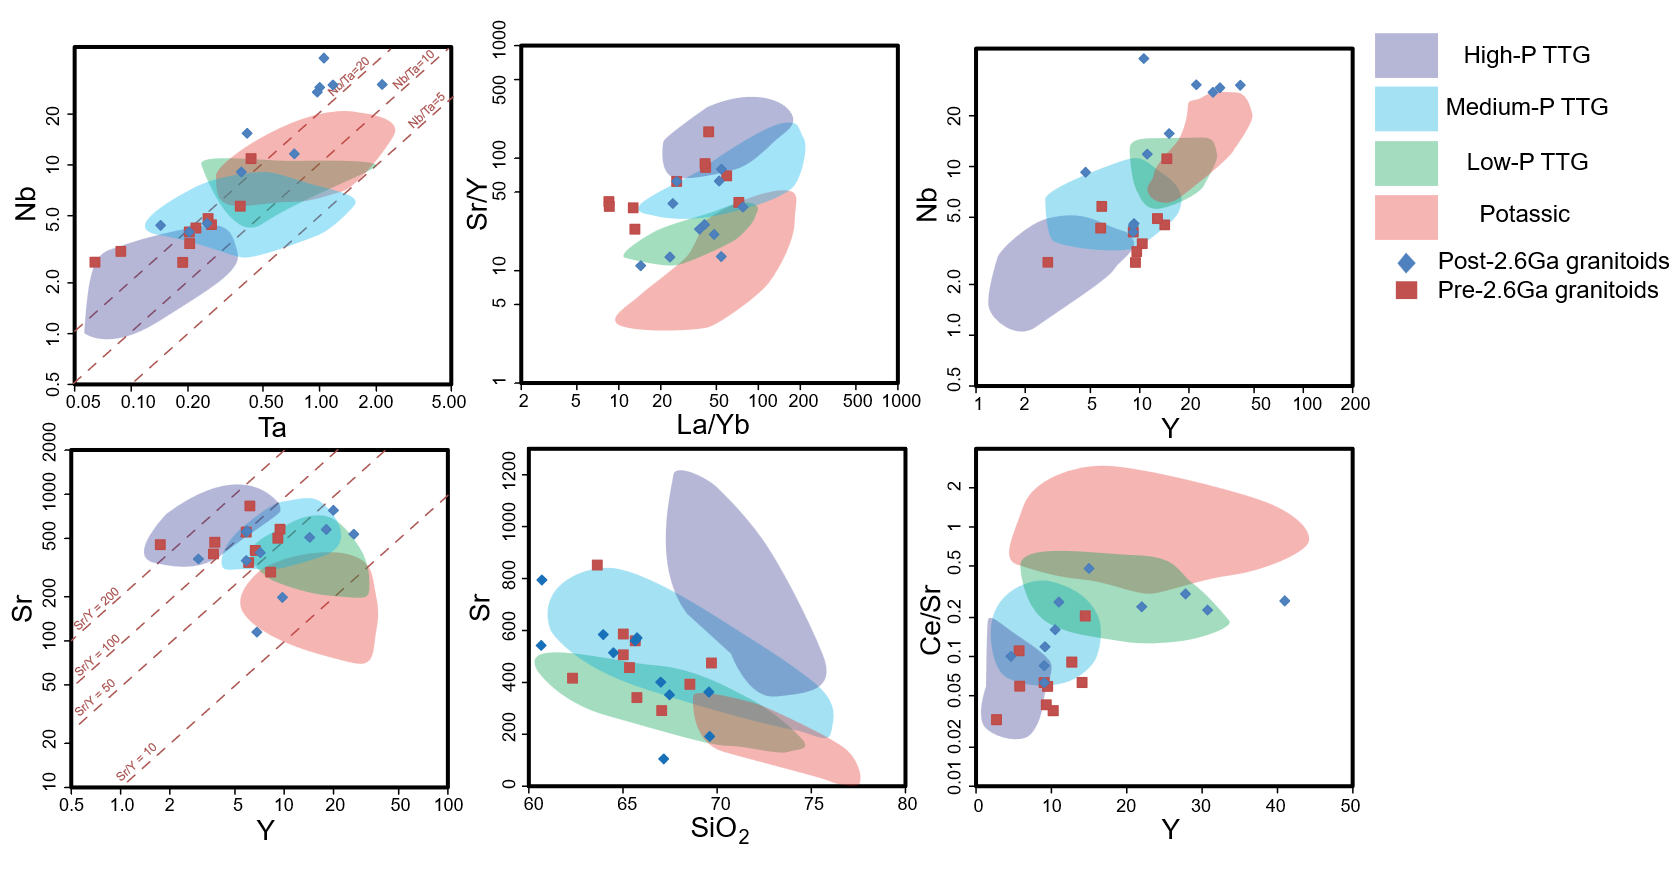


Figure S6: Depth of melting based on the classification diagrams in Moyen (2011). The pink, green, blue and purple color field represents potassic, low-pressure, medium-pressure, and high-pressure melting, respectively. Based on the diagrams, most 2.7Ga granitoids in Luxi formed at medium to high pressure condition, while post 2.7Ga granitoids were formed at medium to low pressure.


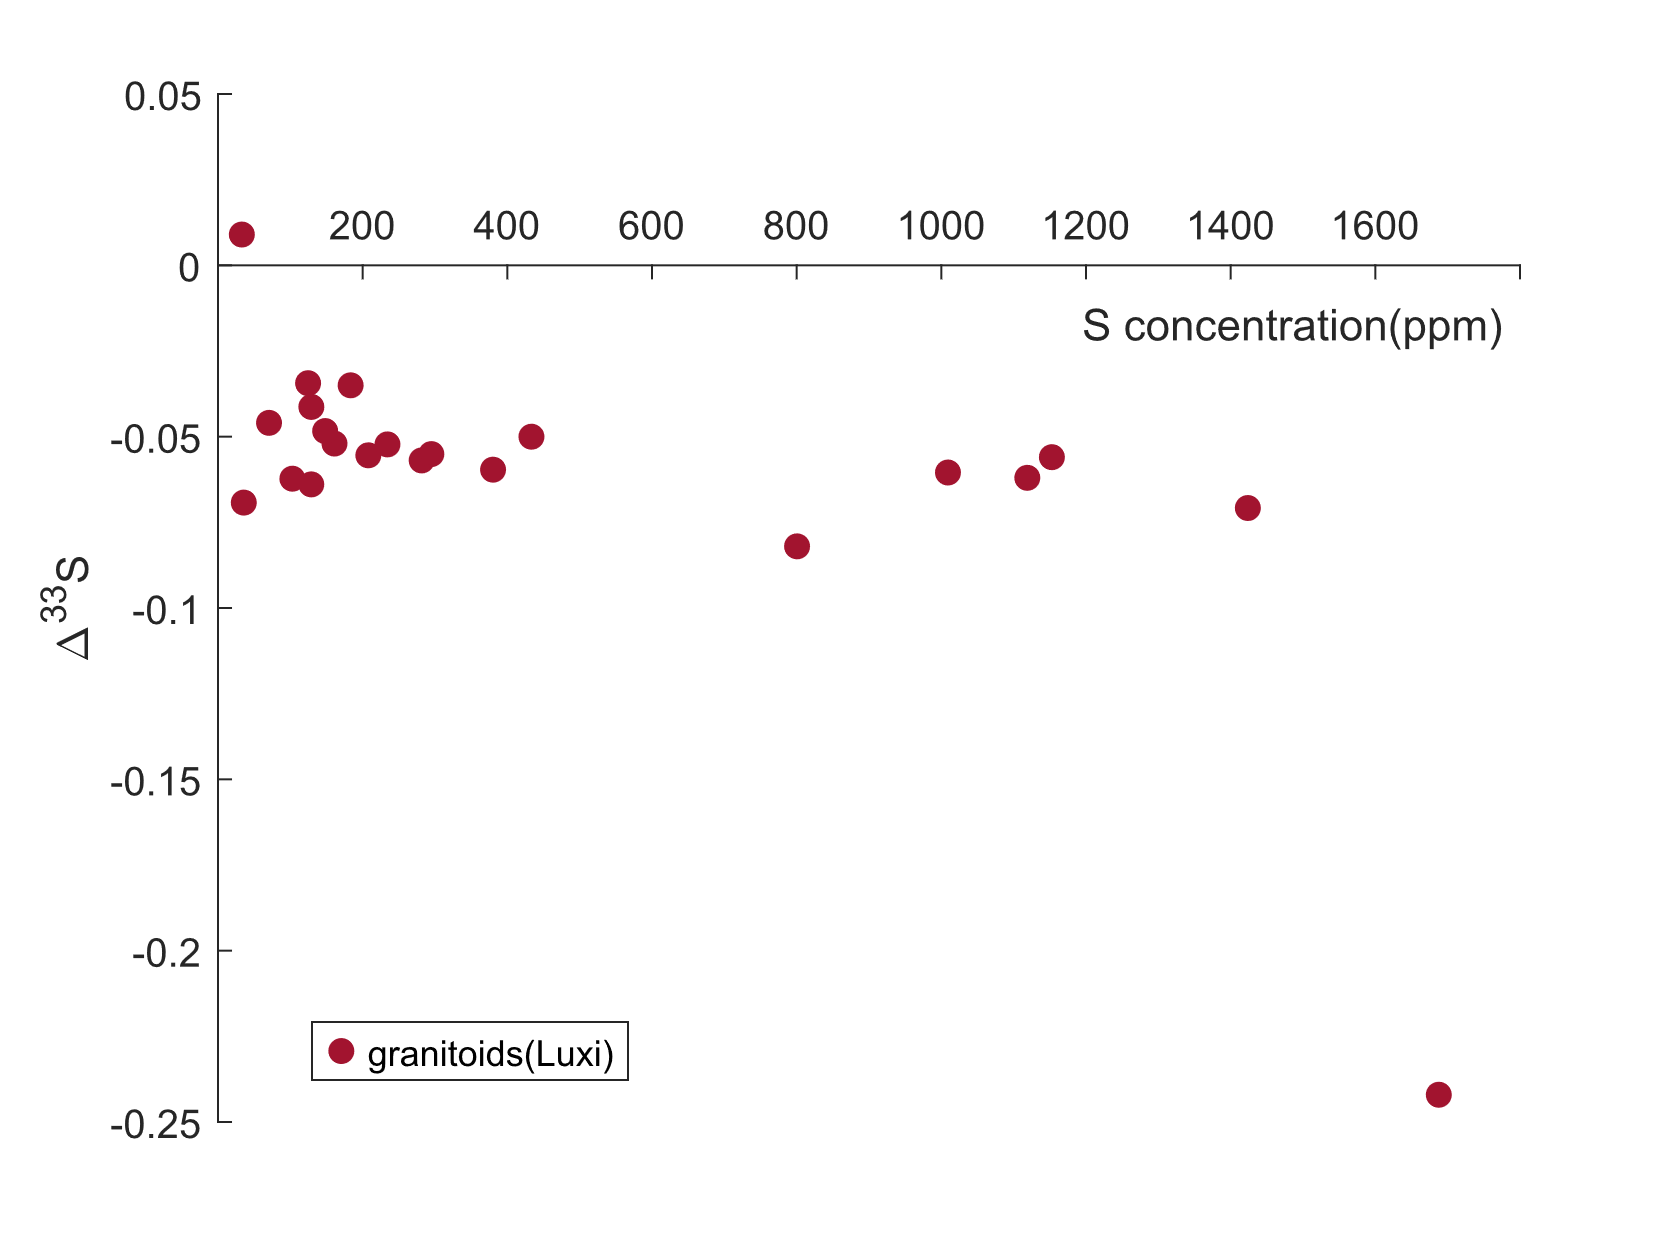


Figure S7: Δ33S vs sulfur concentration of Luxi granitoids. There is no observable correlated existed between sulfur concentration and Δ33S, indicating that the non-zero Δ33S is unlikely to be incorporated into the granitoids via assimilating wall rocks.

Figure S8: sulfur concentration vs age. Increasingly higher sulfur concentration is observed in post 2.6Ga granitoids, while the pre-2.6Ga granitoids are characterized by low sulfur concentrations.


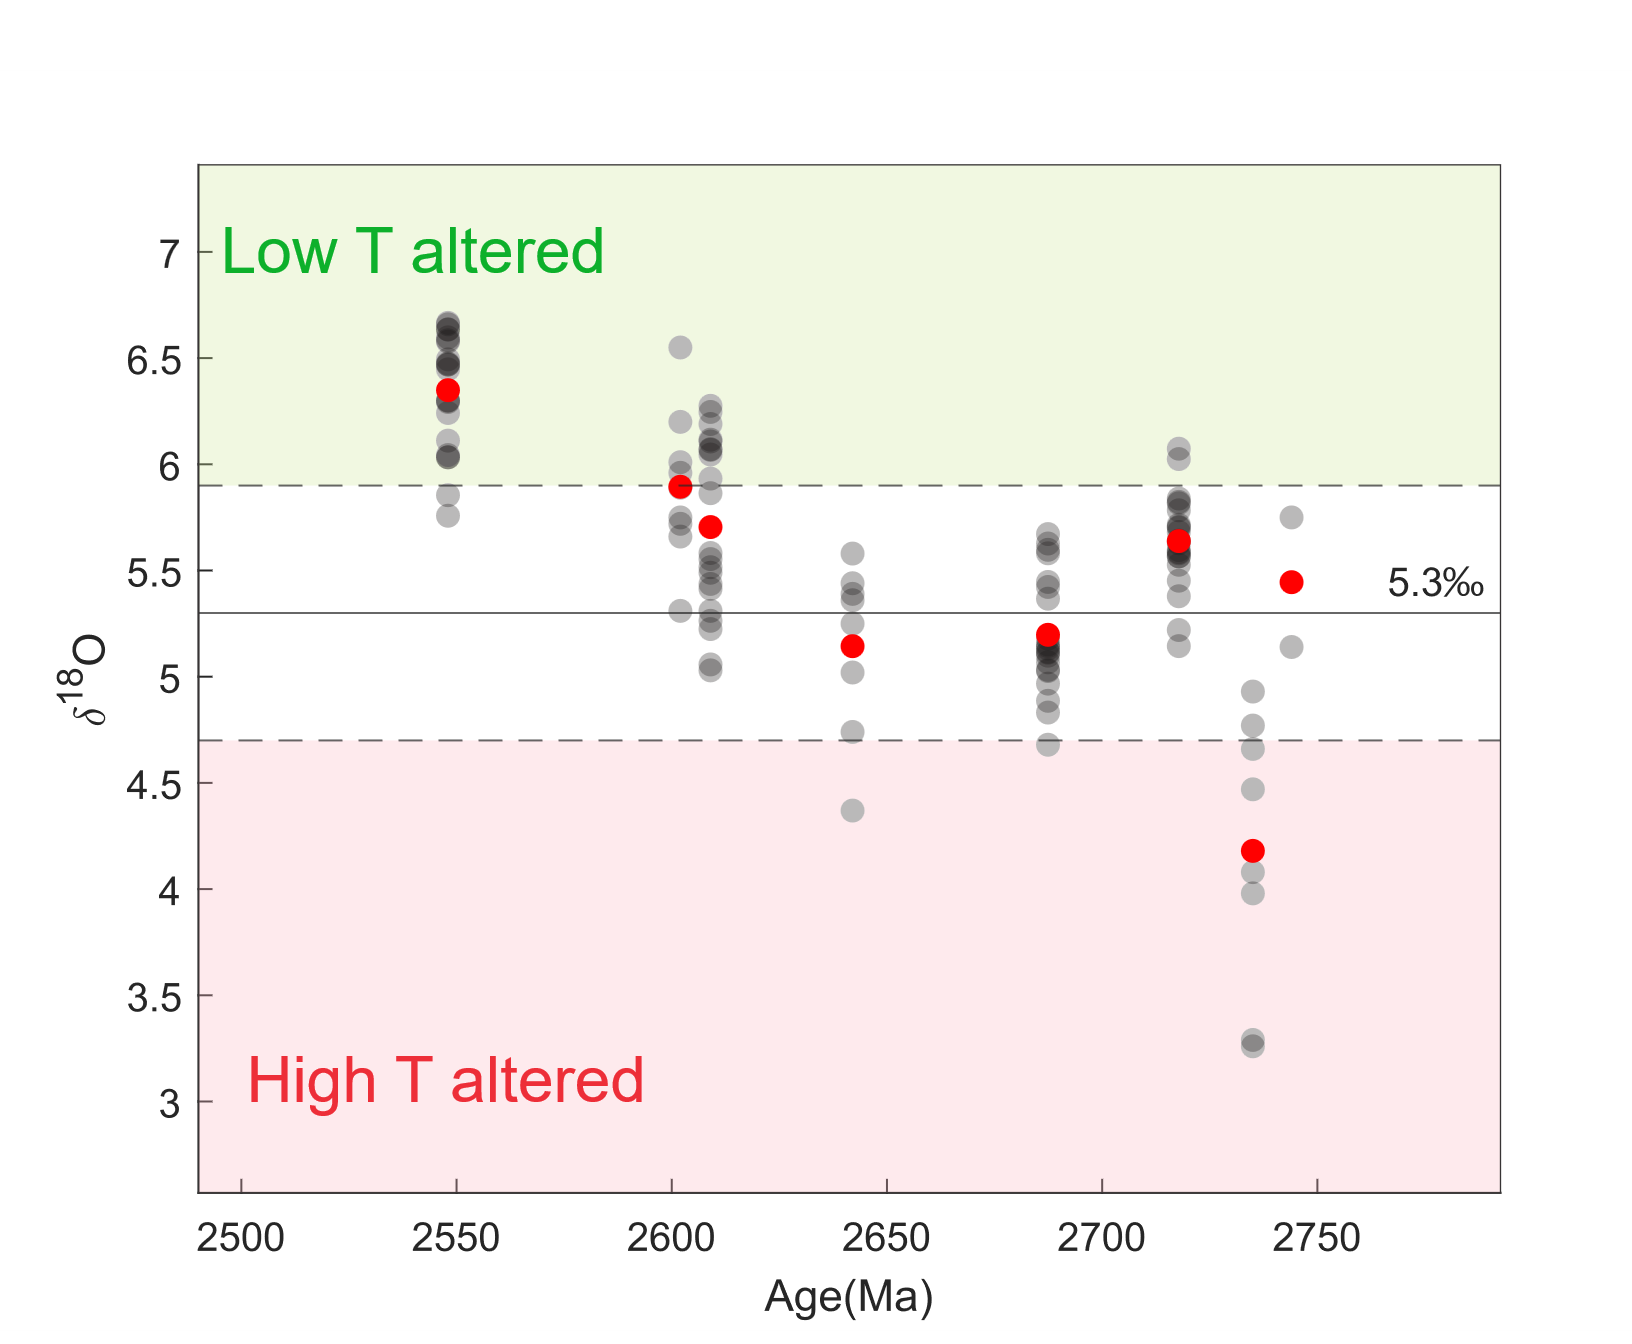


Figure S9: Magmatic zircon oxygen isotope data from granitoids in Luxi area (Chen et al., 2020; Ren et al., 2016). Solid and dashed lines represent the mantle value range of δ18O, which is 5.3 ± 0.06‰ (Valley et al., 1998). Grey data points represent the measured zircon data and red data points are average values. Granitoids formed at or before ~2650 Ma have near chondritic to slightly depleted δ18O. In contrast, post-2650 Ma granitoids show slight enrichment in δ18O, indicating addition of low temperature hydrothermally altered rocks.
