# Supplementary material for: Supracrustal origin of Earth’s earliest continents
Source: Research Square preprint supplement (doi:10.21203/rs.3.rs-8052631/v1), 2025-11-25
Supplement: Supplementary file 2 [file dc1b02d13afd6fe3a5259148.xlsx]

## Sheet: Table S1
Sample ID	δ33S	δ34S	δ36S	Δ33S	Δ36S	long	lat	S(ppm)	Lithology	Age	1σ	Age references
IAEA S1	-7.932	-15.477	-29.727	0.119	-1.038
24QXT 18	1.18	2.27	4.05	0.01	-0.27	117.457	36.4482	32.9	tonalite	2698	14	1
24 MY 17	0.19	0.47	0.59	-0.05	-0.29	117.406	35.3064	433.3	trondhjemite	~2.55Ga		2
24YLG 6	0.73	1.52	2.61	-0.05	-0.29	117.473	36.0108	161	tonalite	2700	19	3
24MY 10	0.56	1.22	2.16	-0.06	-0.15	118.224	35.5635	1118.8	trondhjemite-granodiorite	2591	15	4
24 MY 15	1.01	2.03	3.49	-0.04	-0.37	117.587	35.2981	183.3	granite	2525	4	5
24 MY 11	0.15	0.45	0.48	-0.08	-0.39	118.216	35.5588	800.5	granodiorite	2591	15	4
24MY 05	0.88	1.83	3.16	-0.06	-0.31	117.793	35.5919	1152.8	granodiorite	2525	3	This study
24YLG 05	1.38	2.8	4.9	-0.06	-0.42	117.328	36.059	1009.1	monzogranite	2528	9	This study
24MY 13-2	0.34	0.79	1.09	-0.06	-0.41	118.156	35.4125	102.8	trondhjemite	2683	6	6
24YLG 04	0.32	0.76	1.07	-0.07	-0.37	117.337	36.0602	1423.7	trondhjemite-granite	2528	9	This study
24MY 07	0.98	2	3.55	-0.05	-0.24	117.831	35.5919	70.5	tonalite	2744	14	7
24QXT 01	3.93	7.72	14.42	-0.03	-0.3	117.157	36.2989	124.5	tonalite	~2.55Ga		13
24YLG 03	1.3	2.63	4.63	-0.06	-0.38	117.375	36.0678	294.9	granodiorite	2507	22	8
24QXT 13	0.88	1.84	3.12	-0.07	-0.38	117.353	36.4884	35.6	tonalite	2544	8	9
24MY 01	1.54	3.11	5.57	-0.06	-0.35	117.531	35.7536	281.5	tonalite-granodiorite	2548	10	This study
24MY08-1	-0.41	-0.33	-1.09	-0.24	-0.46	118.009	35.9339	1687.7	trondhjemite-granodiorite	2619	11	This study
24QXT 03-3	0.65	1.38	2.35	-0.06	-0.27	117.154	36.3346	207.8	tonalite	~2.6Ga		14
24QXT 04	-0.66	-1.16	-2.52	-0.06	-0.31	117.246	36.3223	128.9	tonalite	2561	9	10
24QXT 19	1.03	2.09	3.66	-0.05	-0.32	117.452	36.4472	148.1	tonalite	2745	15	12
24MY 03	-0.23	-0.35	-0.99	-0.05	-0.33	117.619	35.723	234.2	tonalite	~2.7Ga		5
24QXT 10-1	-0.35	-0.56	-1.43	-0.06	-0.37	117.38	36.4202	380.2	mylonitized tonalite	2704	10	11
24QXT 10-2	1.09	2.19	3.88	-0.04	-0.29	117.38	36.4202	129	mylonitized tonalite	2704	10	11
24MY 13-1	-0.37	-0.65	-1.69	-0.03	-0.45	118.156	35.4125	1771.7	amphibolite	~2.5Ga
24QXT 06-2	-0.2	-0.21	-0.66	-0.09	-0.26	117.288	36.3716	1437.2	amphibolite	~2.7Ga
24MY 16-1	-0.47	-0.81	-1.82	-0.06	-0.29	117.431	35.2819	195.5	amphibolite	~2.5Ga
24YLG 11	1.34	2.99	5.63	-0.19	-0.05	117.604	36.0252	250.1	amphibolite	~2.7Ga
24QXT 17-2	0.27	0.49	0.58	0.01	-0.36	117.325	36.4862	718.1	amphibolite	~2.7Ga
24QXT 6-1	0.26	0.68	1.06	-0.09	-0.22	117.288	36.3716	42.7	amphibolite	~2.6Ga
References
1.Wang, Wei, Ming-Guo Zhai, Shi-Jin Wang, and M. Santosh. 2016. “Neoarchean Crustal Evolution in Western Shandong Province of the North China Craton: The Role of 2.7–2.6 Ga Magmatism.” Precambrian Research 285 (October): 170–85. https://doi.org/10.1016/j.precamres.2016.09.010.
2.Sun, Guozheng, Shuwen Liu, M. Santosh, Lei Gao, Yalu Hu, and Rongrong Guo. 2019. “Thickness and Geothermal Gradient of Neoarchean Continental Crust: Inference from the Southeastern North China Craton.” Gondwana Research 73 (September): 16–31. https://doi.org/10.1016/j.gr.2019.02.001.
3.Li, Dapeng, Yuelong Chen, Guoliang Xue, et al. 2020. “Initiation of Modern-Style Subduction in the Neoarchean: From Plume to Subduction with Frequent Slab Break-Off.” GSA Bulletin 132 (9–10): 2119–34. https://doi.org/10.1130/B35522.1.
4.Hu, Yalu, Shuwen Liu, Lei Gao, et al. 2019. “Diverse Middle Neoarchean Granitoids and the Delamination of Thickened Crust in the Western Shandong Terrane, North China Craton.” Lithos 348–349 (December): 105178. https://doi.org/10.1016/j.lithos.2019.105178.
5.Sun, Guozheng, Shuwen Liu, Lei Gao, Yalu Hu, and Rongrong Guo. 2020. “Origin of Late Neoarchean Granitoid Diversity in the Western Shandong Province, North China Craton.” Precambrian Research 339 (April): 105620. https://doi.org/10.1016/j.precamres.2020.105620.
6.Dong, Chunyan, Hangqiang Xie, Alfred Kröner, et al. 2017. “The Complexities of Zircon Crystllazition and Overprinting during Metamorphism and Anatexis: An Example from the Late Archean TTG Terrane of Western Shandong Province, China.” Precambrian Research 300 (October): 181–200. https://doi.org/10.1016/j.precamres.2017.07.034.
7.Ren, Peng, Hangqiang Xie, Shijin Wang, et al. 2016. “A ca. 2.60 Ga Tectono-Thermal Event in Western Shandong Province, North China Craton from Zircon U–Pb–O Isotopic Evidence: Plume or Convergent Plate Boundary Process.” Precambrian Research 281 (August): 236–52. https://doi.org/10.1016/j.precamres.2016.05.016.
8.Shi, Kangxing, Changming Wang, M. Santosh, Bin Du, Lifei Yang, and Qi Chen. 2019. “New Insights into Neoarchean–Paleoproterozoic Crustal Evolution in the North China Craton: Evidence from Zircon U–Pb Geochronology, Lu–Hf Isotopes and Geochemistry of TTGs and Greenstones from the Luxi Terrane.” Precambrian Research 327 (July): 232–54. https://doi.org/10.1016/j.precamres.2019.04.010.
9.Chen, Ying, Jian Zhang, Jin Liu, et al. 2020. “Crustal Growth and Reworking of the Eastern North China Craton: Constraints from the Age and Geochemistry of the Neoarchean Taishan TTG Gneisses.” Precambrian Research 343 (July): 105706. https://doi.org/10.1016/j.precamres.2020.105706.
10.Yu, Yang, Dapeng Li, Yuelong Chen, et al. 2021. “Mantle Cooling and Cratonization of Archean Lithosphere by Continuous Plate Subduction: Constraints from TTGs, Sanukitoids, and High-K Granites, Eastern North China Craton.” Precambrian Research 353 (February): 106042. https://doi.org/10.1016/j.precamres.2020.106042.
11.Wang, Wei, Ming-Guo Zhai, Shi-Jin Wang, and M. Santosh. 2016. “Neoarchean Crustal Evolution in Western Shandong Province of the North China Craton: The Role of 2.7–2.6 Ga Magmatism.” Precambrian Research 285 (October): 170–85. https://doi.org/10.1016/j.precamres.2016.09.010.
12.Bai, Wenqian, Chunyan Dong, Zhiyong Song, et al. 2020. “Late Neoarchean Granites in the Qixingtai Region, Western Shandong: Further Evidence for the Recycling of Early Neoarchean Juvenile Crust in the North China Craton.” Geological Journal 55 (9): 6462–86. https://doi.org/10.1002/gj.3824.
13.Sun, Guozheng, Shuwen Liu, M. Santosh, Lei Gao, Yalu Hu, and Rongrong Guo. 2019. “Thickness and Geothermal Gradient of Neoarchean Continental Crust: Inference from the Southeastern North China Craton.” Gondwana Research 73 (September): 16–31. https://doi.org/10.1016/j.gr.2019.02.001.
14.Hu, Yalu, Shuwen Liu, Lei Gao, et al. 2019. “Diverse Middle Neoarchean Granitoids and the Delamination of Thickened Crust in the Western Shandong Terrane, North China Craton.” Lithos 348–349 (December): 105178. https://doi.org/10.1016/j.lithos.2019.105178.

## Sheet: Table S2
	δ30Si v	2SD	δ29Si	2SD /‰	n
24QXT13	-0.00554511	0.0378966	-0.0219993	0.0423022	3
24QXT19	-0.0602435	0.0320536	-0.0281517	0.0438832	3
24YLG05	-0.0611326	0.0420536	-0.0192034	0.0525033	3
24YLG06	-0.071534	0.0381648	-0.0345321	0.0431581	4
24MY07	-0.0872153	0.0300918	-0.0317809	0.0675416	6
24MY08-1	-0.0953385	0.0318962	-0.0207879	0.0233003	3
24MY11	-0.152307	0.0389734	-0.0790804	0.028165	3
24MY13-2	-0.0501308	0.0345692	-0.0293004	0.044131	3
BHVO-2	-0.28	0.05	-0.15	0.04	24

## Sheet: Table S3
Sample ID	SiO2	TiO2	Al2O3	FeOt	TFe2O3	MnO	MgO	CaO	Na2O	K2O	P2O5	LOI	Li	Be	Sc	Ti	V	Mn	Co	Ni	Cu	Zn	Ga	As	Rb	Sr	Y	Zr	Nb	Mo	Cs	Ba	La	Ce	Pr	Nd	Sm	Eu	Gd	Tb	Dy	Ho	Er	Tm	Yb	Lu	Hf	Ta	Pb
24QXT18	62.3419	0.525925	16.6359	4.93931	5.48934	0.0954779	2.39864	5.34848	4.43937	1.45333	0.0839875	0.849952	90.8927	1.03761	9.38335	3162.35	98.2496	771.245	16.2625	32.5143	32.1559	111.295	18.2662	2.07022	137.207	426.473	10.1733	210.799	3.43232	4.35499	8.56621	283.129	8.16474	17.6048	2.16253	9.11026	1.89511	0.737876	1.79665	0.274104	1.61383	0.333505	0.980929	0.152885	1.00623	0.160809	5.06063	0.273401	6.96206
24QXT19	65.7514	0.382586	16.6135	3.78837	4.21024	0.0735624	1.52023	4.49495	4.45659	1.17081	0.0922545	0.771698	12.8167	1.16317	5.29027	2257.08	74.8127	599.066	11.6207	18.2348	6.21752	56.3953	15.9381	1.58102	42.782	351.843	9.2581	152.295	2.65959	6.12755	1.44366	262.727	7.58888	16.1838	1.94764	7.74815	1.70972	0.604011	1.59585	0.247625	1.52429	0.314077	0.919007	0.14137	0.929289	0.143561	4.24819	0.251336	2.92885
24QXT01	65.0292	0.54743	16.8036	3.53956	3.93372	0.0547817	1.31519	3.12359	4.78641	3.55988	0.24266	0.449938	16.0823	0.952617	12.473	2653.54	105.831	653.765	20.6897	77.907	7.25001	74.6034	19.5639	1.48689	49.0184	515.922	13.988	68.3264	4.43138	3.86127	2.73757	624.451	16.4037	35.7241	4.3099	18.4323	3.70211	0.976753	3.16799	0.447524	2.57759	0.500408	1.40144	0.204933	1.35402	0.201261	2.10712	0.357081	8.20788
24QXT03-3	65.3538	0.469086	16.3596	4.96853	5.52182	0.0401016	1.27024	3.93855	4.45663	1.51511	0.18781	0.539388	4.69357	0.729761	2.07987	2775.04	75.4403	287.304	11.3723	10.338	38.8135	80.436	17.7305	2.30251	43.4756	466.427	2.67563	152.975	2.66309	7.41186	1.50535	815.167	8.98216	16.336	1.79203	6.66118	1.16466	0.631822	0.803501	0.100629	0.521486	0.0943509	0.261895	0.0346478	0.212999	0.0352728	3.17456	0.0856345	4.27602
24QXT04	65.6596	0.387748	16.1422	3.98219	4.42564	0.0604135	1.95447	3.91004	4.55817	2.04191	0.160763	0.52879	24.1437	1.15442	5.63218	2367.28	71.1807	422.643	9.79789	19.3205	8.49506	57.8519	19.5377	2.73959	69.6677	569.211	8.97629	107.44	4.01388	7.19114	3.18855	566.716	18.8264	39.2872	4.67004	19.0462	3.58515	0.980195	2.60014	0.333981	1.68903	0.310127	0.870714	0.124534	0.757874	0.114623	2.66399	0.27207	8.83121
24QXT13	68.5548	0.343236	15.548	3.12709	3.47532	0.0398634	1.33514	3.03344	4.98298	1.50191	0.107316	0.699116	9.49172	1.08736	3.39332	2010.41	48.2284	297.84	8.01255	21.2164	51.0207	49.1992	17.8056	2.01054	66.5172	402.624	5.64886	102.515	4.24824	6.8222	3.5366	359.379	23.5565	49.7202	5.50824	20.1717	3.28912	0.575169	2.0813	0.250832	1.16623	0.194845	0.543641	0.0728937	0.415401	0.0632314	2.648	0.294632	7.85157
24YLG03	64.5082	0.829521	15.806	4.37426	4.86137	0.0622619	1.61645	3.5645	4.27828	3.83407	0.313732	0.486276	37.6864	2.39288	10.8289	5127.76	75.0932	480.127	12.4241	18.4786	20.9805	81.8732	29.5275	4.37549	202.117	523.28	21.8886	301.547	29.8373	5.97297	5.90355	1121.65	74.0259	144.647	15.6273	54.7685	8.69135	1.87176	5.96255	0.758208	3.89589	0.70619	1.93924	0.292745	2.0472	0.309792	6.9497	2.89355	19.671
24YLG04	60.7131	1.1327	16.0673	5.85106	6.50262	0.0923324	1.95753	3.96322	4.65503	3.66143	0.525937	0.438948	33.5672	2.39654	14.0644	6994.04	93.6677	733.852	13.239	2.75774	20.8838	126.482	35.2235	6.13848	127.452	801.332	30.5928	455.065	28.6371	6.30871	1.81081	1547.32	92.8745	208.996	24.4181	92.3496	14.1032	2.86569	9.19281	1.11448	5.6735	0.99863	2.73553	0.391179	2.36463	0.339451	9.20806	1.34566	14.8967
24YLG05	63.9653	0.904594	15.3968	4.66296	5.18221	0.0744714	1.5157	3.3878	4.55305	3.94557	0.521627	0.485423	27.3152	2.25827	11.9126	5636.47	71.0304	591.712	10.8138	11.0498	24.119	95.8278	33.5916	5.86264	120.497	592.881	27.6637	468.002	26.8955	5.18499	2.46251	1219.06	100.817	207.546	23.2308	84.2705	12.6745	2.3785	8.15009	1.00036	5.11113	0.909298	2.45724	0.357229	2.18357	0.324179	9.51974	1.30665	16.641
24YLG06	67.4799	0.471868	15.1504	3.88094	4.31311	0.0509118	1.83702	4.61249	4.07801	1.4253	0.0877453	0.387481	11.227	0.847189	6.16029	2901.82	69.798	386.333	12.2148	29.52	8.76162	69.8412	19.9056	2.51412	46.4243	362.15	8.97306	166.631	4.39393	6.00136	0.989285	591.542	18.0911	34.0551	3.55861	13.4556	2.40199	0.801529	2.07593	0.306828	1.65514	0.313996	0.84809	0.127279	0.776462	0.110018	4.01238	0.191316	5.11157
24MY08-1	67.1704	0.620118	13.7671	5.94655	6.60875	0.0656024	2.2733	2.2201	3.705	2.35693	0.0890494	0.40248	78.1015	2.59745	10.6703	3622.39	77.7423	484.81	15.6901	46.974	65.7358	123.01	23.098	1.30716	291.082	117.531	10.4156	87.1732	42.6257	15.0045	9.52567	108.164	10.8344	21.3132	2.3109	9.11301	2.19446	0.453973	2.08962	0.326121	1.83236	0.349271	0.976958	0.135026	0.78945	0.114458	2.51163	1.41639	14.9786
24MY01	65.0292	0.54743	16.8036	3.53956	3.93372	0.0547817	1.31519	3.12359	4.78641	3.55988	0.24266	0.449938	27.8002	1.75347	6.36352	3413.12	39.782	426.402	7.74081	12.8608	17.4224	87.8202	29.0034	4.3452	128.48	595.069	14.4228	252.674	10.9019	4.01912	1.44995	1223.28	73.5767	139.222	14.679	50.9342	7.16756	1.61242	4.71752	0.559507	2.8392	0.481969	1.3166	0.179162	1.06069	0.154262	5.27898	0.580016	14.1752
24MY05	60.6795	1.17987	14.5309	7.00799	7.78838	0.102652	2.59938	4.76269	4.04672	2.91145	0.977266	0.410901	38.3883	1.79659	13.1152	6943.27	109.493	787.212	20.6636	26.7874	45.0521	118.242	32.1393	5.2776	138.84	551.274	40.8015	347.192	29.6348	5.86489	2.90898	635.864	70.2613	169.539	22.0377	91.5076	17.3965	2.87504	12.3241	1.64128	8.41936	1.45533	3.84515	0.517805	3.16297	0.435452	7.69309	1.58259	12.9164
24MY07	67.0666	0.548116	14.5078	4.29955	4.77834	0.0615722	1.67445	5.11924	4.27212	1.36685	0.112627	0.454128	8.86717	0.740791	5.97047	3212.25	80.1087	473.871	13.9608	17.5923	9.99775	63.1963	18.9079	2.22968	46.4946	302.054	12.6343	217.065	4.82445	7.77469	1.45156	375.388	14.8859	30.3676	3.45386	13.672	2.69536	0.817206	2.37679	0.369697	2.19873	0.429717	1.21681	0.190172	1.19457	0.18396	5.24891	0.343081	4.45602
24MY10	69.5564	0.35397	14.6084	2.74452	3.05014	0.0400461	1.48201	2.82579	4.40961	2.61984	0.0826985	0.487533	24.9415	2.14085	4.2448	2066.17	53.6765	297.042	8.93503	26.3906	10.9893	52.0647	18.7862	1.71724	131.106	372.78	4.56944	225.813	9.07008	8.51071	3.89711	420.148	23.3371	41.5836	4.03012	13.4631	1.90882	0.672798	1.36888	0.160077	0.837674	0.152282	0.426065	0.0659059	0.448915	0.0741453	5.77924	0.514619	15.3679
24MY11	67.0162	0.478072	14.7257	4.64179	5.15869	0.0653002	2.36924	2.88931	3.57009	2.62369	0.154767	0.797256	28.6846	1.48467	8.69735	2815.28	80.499	496.063	14.8191	49.4942	28.6057	75.3229	26.6944	3.7008	103.216	410.794	10.9278	99.4602	11.6169	8.05954	2.16126	705.611	64.6077	123.913	12.8844	43.1148	5.89685	0.938925	3.574	0.417109	2.05786	0.370912	1.03706	0.145393	0.869301	0.1307	2.50971	0.985173	14.1508
24MY15	69.5999	0.387414	15.0088	2.42435	2.69433	0.0391087	0.611457	1.27054	4.09747	5.19256	0.121365	0.551552	8.39899	1.4586	7.21409	2335.01	23.1896	297.968	3.27526	5.30479	6.58447	48.0773	23.3045	3.25591	108.663	203.017	14.9053	197.95	15.3528	8.38296	0.502625	879.359	58.864	113.093	12.2903	43.344	6.73533	1.03832	4.45606	0.581297	3.00345	0.527484	1.39791	0.188431	1.13392	0.16629	4.49941	0.552991	39.1071
24MY17	65.761	0.320825	17.0867	2.6148	2.90598	0.0499337	0.801522	2.59289	5.64533	3.52245	0.1476	0.654844	13.6459	1.19761	5.33123	1878.48	29.0231	375.211	3.62613	3.24405	24.5333	51.4401	21.2102	3.33863	90.9665	580.173	9.07563	417.764	4.51686	6.05832	2.62453	1830.99	45.0877	77.137	8.46168	29.899	4.20809	1.531	2.81222	0.335464	1.70291	0.306895	0.897776	0.133112	0.901214	0.147036	9.04343	0.33778	15.4508
24MY13-2	69.6967	0.322921	15.6744	2.37638	2.64101	0.0439356	0.837615	2.66493	5.68119	1.43383	0.10973	0.453338	35.568	1.65209	3.0851	1922.4	31.2659	337.296	5.27442	5.82339	2.65285	80.9195	20.371	2.76905	81.9297	484.203	5.74931	120.816	5.70147	5.79927	7.25769	218.467	16.9481	31.2543	3.40943	12.0915	2.09591	0.593928	1.56433	0.208671	1.0709	0.193354	0.512912	0.0740808	0.423446	0.061355	2.95142	0.509025	9.8603
24MY03	63.6528	0.426999	16.3613	3.73421	4.15004	0.0528089	2.03242	5.98196	4.81008	1.30508	0.274731	0.631871	13.0353	0.97347	5.27181	2541.69	60.7675	389.498	11.363	18.5479	1.1373	70.4337	22.484	2.76724	37.0716	858.682	9.42471	183.233	3.08479	5.37728	1.11382	823.732	27.6511	55.2855	6.65409	26.3841	4.52643	1.41512	3.23506	0.406354	1.93042	0.337251	0.883399	0.117045	0.69613	0.104165	4.10086	0.117612	5.75835
24QXT10-1	61.8635	0.468064	14.8067	4.75733	5.2871	0.0798727	3.84303	4.40725	4.62566	1.91513	0.195359	2.08609	29.3	1.3372	11.9388	2826.74	88.267	641.39	19.9894	107.365	25.0538	71.9953	21.9982	3.13828	65.6359	622.777	12.0526	153.847	7.42276	3.09113	4.53426	606.417	32.0506	66.9443	7.71976	30.0528	5.19662	1.31847	3.60149	0.447293	2.26	0.412023	1.08792	0.163037	1.00198	0.153333	3.6087	0.429425	10.4754
24QXT10-2	68.7401	0.304708	15.98	2.70277	3.00375	0.038555	1.45654	3.8742	4.59485	1.21145	0.118653	0.789943	1.69962	0.862296	3.49871	1799.4	43.8101	297.768	8.28467	27.0497	8.40934	43.3538	16.4362	1.71313	31.8668	468.729	4.86074	133.02	4.16314	7.59096	4.26108	368.043	17.4378	37.7934	4.04454	14.7638	2.30398	0.664213	1.53953	0.188624	0.929051	0.165301	0.441611	0.0595354	0.378709	0.0606879	3.4066	0.261128	5.2768
24MY13-1	53.3364	0.995341	13.2382	9.48393	10.54	0.130967	7.1114	7.82806	3.42281	2.00514	0.610688	0.868187	36.3622	1.70799	20.7085	5998.19	205.609	1027.23	40.8624	131.288	77.4555	98.7548	21.7596	4.0503	63.1697	785.255	20.2073	148.725	10.4461	3.86733	2.4654	671.943	34.4024	81.5839	11.0457	48.5282	9.25831	2.44549	6.87255	0.851545	4.14365	0.706286	1.78755	0.239674	1.39354	0.197345	3.33018	0.467664	9.65278
24QXT06-2	48.9319	0.553661	6.72011	10.9611	12.1817	0.198187	17.6349	10.6876	1.07666	0.137118	0.0124302	1.84956	13.2117	0.26874	35.6142	3300.97	187.892	1568.79	67.0612	357.976	40.543	101.977	11.2621	2.86952	1.90716	40.5176	14.3149	24.397	0.923945	1.39391	0.337972	16.2732	1.87117	8.29485	1.61101	9.38088	2.96123	0.812761	2.99289	0.455162	2.69569	0.545067	1.50815	0.210745	1.30458	0.180757	0.844775	0.0404379	0.551322
24MY16-1	53.2952	0.557569	14.4794	7.72946	8.59019	0.129119	8.71663	6.85834	3.49845	2.0083	0.304139	1.26514	25.3582	0.948137	18.2022	3366.22	141.585	1024.02	42.2993	122.187	57.7808	84.2079	17.6916	3.12375	69.5048	891.459	12.4094	58.7275	3.49969	3.44971	6.58146	800.881	20.8954	43.4597	5.29674	21.6179	4.05624	1.1394	3.12172	0.416259	2.26482	0.435149	1.20114	0.173195	1.07662	0.1546	1.41603	0.208116	6.2854
24YLG11	37.254	0.100421	2.40483	9.14139	10.1594	0.127779	36.915	0.0922007	0.00491808	0.00497991	0.00311079	12.3089	7.84912	0.888902	10.1936	617.806	62.831	991.092	135.347	2271.82	7.55456	63.8745	2.34325	16.1153	0.334285	1.22256	1.9971	7.37166	0.242769	0.197687	1.41675	1.23726	0.276065	0.704667	0.0975367	0.498479	0.171166	0.0563792	0.234874	0.0454608	0.290012	0.0705201	0.228574	0.0405133	0.270104	0.0440414	0.198284	0.0202912	0.0474923
24QXT17-2	49.4438	0.907776	14.4268	11.0814	12.3154	0.332835	7.3135	11.9903	2.09247	0.135615	0.0726039	0.929846	15.1144	0.272248	41.3825	5520.1	303.862	2777.41	52.8418	151.178	105.357	79.4082	14.545	6.1662	2.21791	127.251	22.4568	52.6516	2.89116	4.20503	0.0724184	20.5031	2.80225	7.71509	1.1591	6.25483	2.2326	0.81508	3.0343	0.53455	3.68848	0.792791	2.34165	0.352257	2.2891	0.344034	1.45317	3.71054	0.446246
24QXT06-1	49.5131	0.593421	6.77197	10.3092	11.4572	0.183627	17.366	10.3811	1.25442	0.199359	0.0279799	1.92564	10.5298	0.320988	33.9902	3587.41	178.094	1475.6	65.7412	531.357	33.2842	98.0404	10.4675	2.58261	3.9785	64.6827	13.8931	25.8638	1.26914	0.517862	1.12808	23.0206	2.64976	9.90562	1.74056	9.42472	2.79539	0.877271	2.86634	0.438128	2.69012	0.529134	1.4429	0.208262	1.2737	0.178534	0.950914	0.0516689	0.511228
[truncated: 11 more columns]
